# Supplementary material
Source: ML conference proceedings conference paper supplement (https://openreview.net/forum?id=458m5RSMgJ)
Supplement: supplementary_material [file Supplemental_Material.pdf › ESCA_Supplemental_Material/Supplemental_Material.pdf]

---

# Supplemental Materials

---

Anonymous Author(s)

Affiliation

Address

email

## 1 Anonymized Resources

2 We provide an anonymous project website, which includes a demo video showcasing our method.  
3 This website can be found at <https://anonymous.4open.science/w/ESCA-5FC8/>.

## 4 A Proof of Scaling Invariance

5 Let the convolution layer take an input tensor  $X \in \mathbb{R}^{C_{\text{in}} \times H \times W}$  and a weight tensor  $W \in$   
6  $\mathbb{R}^{C_{\text{out}} \times C_{\text{in}} \times k_h \times k_w}$ . For clarity we fix a single output channel and suppress the output-channel index;  
7 the argument is identical for every output filter. With the usual definition of discrete convolution (\*),  
8 the pre-activation output is

$$Y = \sum_{c=1}^{C_{\text{in}}} W[c] * X[c], \quad (1)$$

9 where  $W[c] \in \mathbb{R}^{k_h \times k_w}$  and  $X[c] \in \mathbb{R}^{H \times W}$  denote the  $c$ -th input-channel kernel and feature map,  
10 respectively.

11 Choose positive scalars  $s_1, \dots, s_{C_{\text{in}}}$ . Define the scaled activations and the compensated weights

$$\tilde{X}[c] = s_c X[c], \quad \tilde{W}[c] = \frac{1}{s_c} W[c], \quad c = 1, \dots, C_{\text{in}} \quad (2)$$

12 For any scalar  $\alpha \in \mathbb{R}$  and tensors  $A, B$  of compatible shape, convolution is bilinear:

$$(\alpha A) * B = \alpha (A * B), \quad A * (\alpha B) = \alpha (A * B) \quad (3)$$

13 Using Equation 3 with  $\alpha = s_c$  and  $\alpha = 1/s_c$ ,

$$\left(\frac{1}{s_c} W[c]\right) * (s_c X[c]) = \frac{1}{s_c} s_c (W[c] * X[c]) = W[c] * X[c] \quad (4)$$

14 Summing Equation 4 over all input channels reproduces Equation 1:

$$\tilde{Y} = \sum_{c=1}^{C_{\text{in}}} \tilde{W}[c] * \tilde{X}[c] = \sum_{c=1}^{C_{\text{in}}} W[c] * X[c] = Y \quad (5)$$

15 Channel-wise scaling of activations, paired with the reciprocal scaling of the corresponding kernels,  
16 leaves the convolution output unchanged. Hence  $\tilde{Y} = Y$ , proving the scale invariance claim.

## 17 B Proof of Fusing Scaling into Previous Layer Weights

18 Let

$$X^{(1)} \in \mathbb{R}^{C_{in} \times H \times W}, \quad W^{(1)} \in \mathbb{R}^{C_{out} \times C_{in} \times k_h \times k_w}, \quad B^{(1)} \in \mathbb{R}^{C_{out}} \quad (6)$$

19 and define the

$$X^{(2)} = W^{(1)} * X^{(1)} + B^{(1)} \quad (7)$$

20 Let  $s \in \mathbb{R}_{>0}^{C_{out}}$  be a per-output-channel scale, and write  $s \otimes T$  for broadcast Hadamard multiplication  
21 along all trailing dimensions of a tensor  $T$  whose first index has size  $C_{out}$ .

**Claim.**

$$\tilde{X}^{(2)} = s \otimes X^{(2)}[:, :, :] = (s \otimes W^{(1)}[:, :, :]) * X^{(1)} + s \otimes B^{(1)} \quad (8)$$

22 Fix an output channel  $c \in \{1, \dots, C_{out}\}$  and spatial index  $(i, j)$ . By definition of convolution with  
23 bias,

$$X_{c,i,j}^{(2)} = \sum_{m=1}^{C_{in}} \sum_{u=0}^{k_h-1} \sum_{v=0}^{k_w-1} W_{c,m,u,v}^{(1)} X_{m,i-u,j-v}^{(1)} + B_c^{(1)} \quad (9)$$

24 Multiply Equation 9 by the scalar  $s_c$ :

$$s_c X_{c,i,j}^{(2)} = \sum_{m,u,v} (s_c W_{c,m,u,v}^{(1)}) X_{m,i-u,j-v}^{(1)} + s_c B_c^{(1)} \quad (10)$$

25 The summation term in Equation 10 is exactly the  $(c, i, j)$ -entry of the convolution  $(s \otimes W^{(1)}) * X^{(1)}$ ,  
26 while the final term is the  $(c, i, j)$ -entry of  $s \otimes B^{(1)}$  (broadcast spatially). Since (2) holds for every  
27  $c, i, j$ , we obtain

$$s \otimes X^{(2)} = (s \otimes W^{(1)}) * X^{(1)} + s \otimes B^{(1)} \quad (11)$$

28 which proves the claim.

29 Scaling each output channel by  $s$  can be equivalently implemented by scaling the corresponding  
30 output-channel kernels in  $W^{(1)}$  before convolution. In quantization or inference-time fusion, this  
31 lets us absorb channel-wise activation rescaling into the layer's weights, avoiding an extra runtime  
32 operation.

## 33 C Proof of scaling invariance before and after im2col

34 Let  $X \in \mathbb{R}^{C_{in} \times H_{in} \times W_{in}}$  be the activation tensor feeding a ConvTranspose2d layer.  $\text{im2col}(\cdot)$  convert  
35 its argument to a 2-D matrix in which every column is the receptive-field patch that contributes to  
36 one output location.

$$X_{col} = \text{im2col}(X) \in \mathbb{R}^{(C_{in} K_h K_w) \times N} \quad (12)$$

37 where  $N = H_{out} W_{out}$  is the number of spatial sites produced by the layer.

38  $W \in \mathbb{R}^{C_{in} \times C_{out} \times K_h \times K_w}$  be the kernel of the transposed convolution, reshaped into

$$W_{mat} = \text{reshape}(W) \in \mathbb{R}^{(C_{in} K_h K_w) \times (C_{out})} \quad (13)$$

39 After  $\text{im2col}$ , transposed convolution is a plain matrix multiply followed by  $\text{col2im}$  accumulation

$$Y_{col} = W_{mat}^T X_{col} \quad (14)$$

40 then  $Y = \text{col2im}(Y_{col})$ .

41 Let the per-channel scale vector be  $s = [s_1, \dots, s_{C_{in}}]^T$  with  $s_c > 0$ . Define  $S_{act} = \text{diag}(s) \otimes I_{K_h K_w}$ ,  
42 where  $I_{K_h K_w}$  is the identity matrix of size  $K_h \times K_w$ . The Kronecker product  $\otimes$  constructs a block-  
43 diagonal matrix  $S_{act}$ , and  $S_{act} \in \mathbb{R}^{(C_{in} K_h K_w) \times (C_{in} K_h K_w)}$ . Every column block belonging to  
44 channel  $c$  is multiplied by the same scalar  $s_c$ .

45 We scale activations and invert-scale the weights  $\tilde{X}_{col} = S_{act} X_{col}$  and  $\tilde{W}_{mat} = S_{act}^{-1} W_{mat}$ .

46 Propagating the scaled quantities through the same algebra as (14).

$$\tilde{Y}_{col} = \tilde{W}_{mat}^T \tilde{X}_{col} = (S_{act}^{-1} W_{mat})^T (S_{act} X_{col}) \quad (15)$$

47 From  $S_{act}$  is diagonal,  $S_{act}^{-1} = S_{act}^{-1T}$ .

$$\tilde{Y}_{col} = W_{mat}^T S_{act}^{-1} S_{act} X_{col} = W_{mat}^T X_{col} = Y \quad (16)$$

## 48 D Sensitivity to Facial-Feature-Aware Threshold $k$ (4-bit)

49 We test the facial-feature-aware smoothing threshold  $k$  from 30 to 95 for our full 4-bit ESCA pipeline  
 50 (ICAS + FFAS + UV-weighted Hessian PTQ). Figure 1 and Table 1 report perceptual quality on  
 51 the front, left, and right camera views. Quality improves monotonically as  $k$  increases from 30  
 52 to the 75–80 band, after which it degrades. The optimal window ( $k \approx 75$ –80) yields the highest  
 FovVideoVDP on all three views, so we adopt  $k = 75$  as the default throughout the main paper.

Table 1: 4-bit reconstruction quality (VDP  $\uparrow$ ) vs. smoothing threshold  $k$ . Rows are camera views; columns list the  $k$  values.

| Metric                 | View  | 30     | 40     | 50     | 60     | 70     | 75            | 80            | 85     | 90     | 95     |
|------------------------|-------|--------|--------|--------|--------|--------|---------------|---------------|--------|--------|--------|
| FovVideoVDP $\uparrow$ | Front | 5.6446 | 5.6559 | 5.6575 | 5.6681 | 5.6925 | 5.7184        | <b>5.8541</b> | 5.8274 | 5.8230 | 5.7862 |
|                        | Right | 4.9189 | 4.9273 | 4.9394 | 4.9427 | 4.9589 | <b>4.9605</b> | 4.9550        | 4.9436 | 4.8819 | 4.8187 |
|                        | Left  | 4.9074 | 4.9145 | 4.9167 | 4.9337 | 4.9683 | <b>4.9795</b> | 4.9660        | 4.9659 | 4.9146 | 4.8495 |

53  
 54 For small  $k$  values, Our model employs excessive smoothing, yielding FovVideoVDP scores compa-  
 55 rable to ICAS-UV due to suppressed high-frequency facial details and minimal improvement. As  
 56  $k$  increases to mid-range values, smoothing intensity decreases and VDP scores rise monotonically  
 57 across all viewpoints, indicating progressive fine-detail recovery. Optimal performance occurs within  
 58 the narrow range  $k = 75/80k$ , achieving balanced outlier suppression and detail preservation. For  
 59  $k \geq 85$ , FFAS provides negligible channel scaling, causing performance degradation toward the  
 60 no-smoothing baseline (UV-weighted PTQ without ICAS).

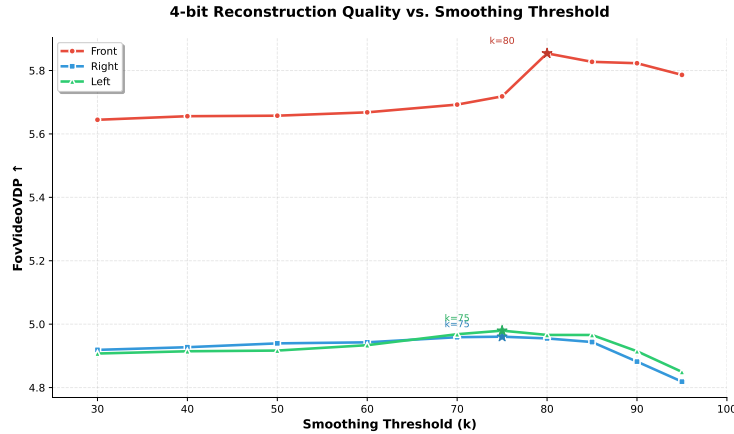

Figure 1: Trend of FovVideoVDP vs.  $k$  (averaged over views). Peak quality occurs in the  $k = 75$ –80 region; quality drops for  $k > 80$ .

## 61 E Additional Rendering Results

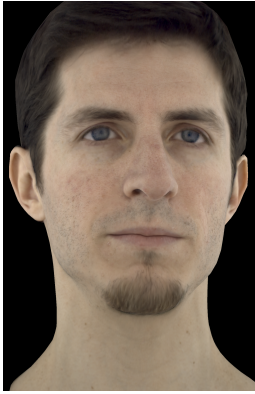

(a) Front

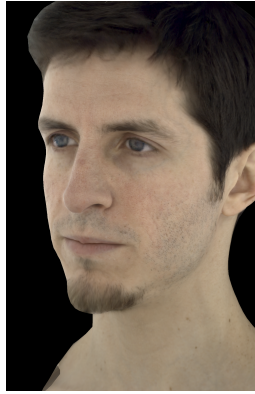

(b) Left

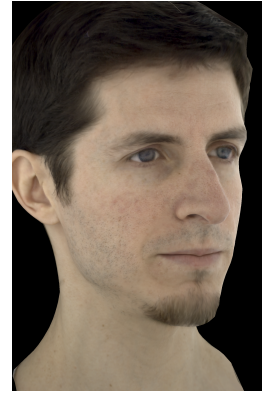

(c) Right

**(a) Full-precision baseline (FP32)**

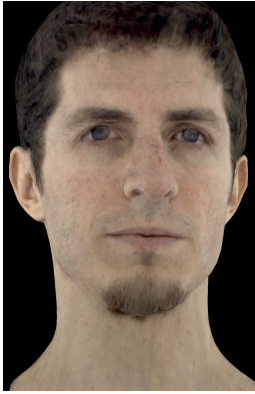

(d) Front

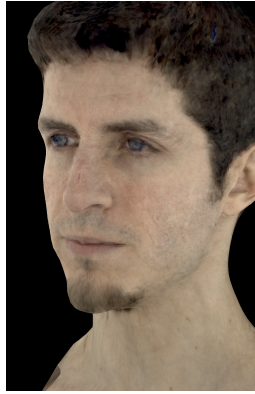

(e) Left

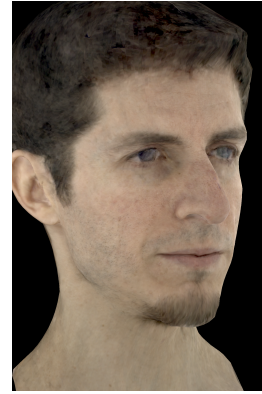

(f) Right

**(b) Best prior low-bit baseline (4-bit)**

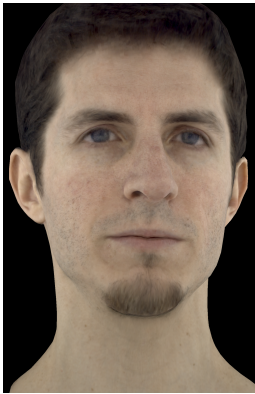

(g) Front

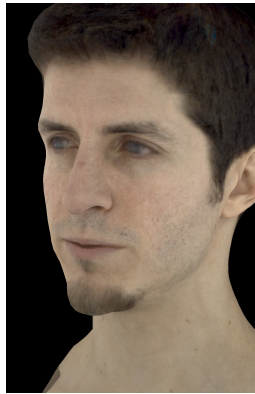

(h) Left

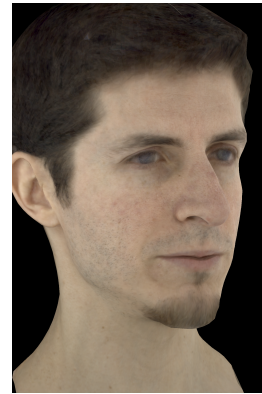

(i) Right

**(c) ESCA (4-bit, ours)**

Figure 2: **Qualitative comparison of avatar reconstructions.** Each row shows renderings produced by a different model (full-precision, prior 4-bit baseline, and our ESCA, FFAS+UV). Columns correspond to three viewpoints. ESCA maintains facial detail (eyes, mouth, skin texture) that the prior low-bit model blurs, while with high fidelity.
